# Supplementary material for: Salmonella spp. in Pet Reptiles in Portugal: Prevalence and Chlorhexidine Gluconate Antimicrobial Efficacy
Source: Antibiotics (Basel). 2021 Mar 19;10(3):324. doi: 10.3390/antibiotics10030324 (PMC8003820; doi:10.3390/antibiotics10030324)
Supplement: Supplementary file 1 [file antibiotics-10-00324-s001.xlsx]

## Sheet: Table S1
Table S1 - Detailed information regarding the studied Salmonella isolates and the results of Antimicrobial Susceptibility analysis, Virulence Phenotype analysis, Minimum Inhibitory Concentration, Minimum Bactericidal Concentration, Minimum Biofilm Inhibitory Concentration and Minimum Biofilm Eradication Concentration Determination and Biofilm Formation.
Isolate number	Group	Species	Owner	API20E	AMC	AMP	AK	C	CTX	ENR	NA	P	CIP	SXT	TE	Hemol.	Lipo.	Dnase	Gelat.	MIC	MBC	MBIC	MBEC	MBC/MIC	Biofilm
4	Ophidian	Python regius	A	Salmonella enterica subsp. arizonae	S	S	S	S	S	S	S	R	S	S	I	+	+	+	-	10.715	188.4	14.29	232.15	17.5828	5.7
12	Chelonian	Pseudemys spp.	B	Salmonella spp.	S	S	S	S	S	S	S	R	S	S	I	+	+	-	-	9.18	32.14	33.34	33.34	3.50109	4
21	Ophidian	Pantherophis guttatus guttatus	C	Salmonella spp.	S	S	S	S	S	S	S	R	S	S	S	+	+	+	-	13.4	52.68	71.43	89.29	3.93134	4.5
26	Chelonian	Geochelone sulcata	D	Salmonella enterica subsp. arizonae	R	R	S	S	S	S	S	R	S	S	S	+	+	+	-	11.91	32.15	57.15	71.43	2.69941	5.5
27	Chelonian	Chelonoidis carbonaria	D	Salmonella enterica subsp. arizonae	S	S	R	S	S	S	S	I	S	S	S	+	+	+	-	23.81	23.81	71.43	585.72	1	-
30	Saurian	Pogona vitticeps	E	Salmonella spp.	S	S	S	S	S	S	S	R	S	S	S	+	+	-	-	9.52	11.91	71.43	714.29	1.25105	3.7
31	Saurian	Pogona vitticeps	E	Salmonella spp.	S	S	S	I	S	S	S	R	S	S	S	+	+	+	-	9.52	28.57	57.15	480.96	3.00105	3.7
32	Saurian	Pogona vitticeps	E	Salmonella spp.	S	S	S	I	I	S	S	R	S	R	S	+	+	+	-	10.72	19.65	42.86	250	1.83302	3.7
33	Saurian	Physignatus cocincinus	E	Salmonella spp.	S	S	S	S	S	I	R	R	S	S	S	+	+	-	-	9.18	11.43	52.38	288.1	1.2451	3.7
34	Saurian	Pogona vitticeps	E	Salmonella spp.	S	S	S	S	I	S	S	R	S	S	S	+	+	-	-	11.91	11.91	71.43	71.43	1	4
35	Chelonian	Centrochelys sulcata	F	Salmonella spp.	S	S	S	S	S	I	R	R	S	S	S	+	+	-	-	11.91	35.72	71.43	585.72	2.99916	5.3
36	Chelonian	Testudo horsfield	F	Salmonella spp.	R	R	S	S	I	I	S	R	S	S	I	+	+	-	-	8.33	21.43	57.15	428.58	2.57263	5.7
41	Chelonian	Sternotherus odoratus	F	Salmonella spp.	S	S	S	S	S	S	S	R	S	S	S	+	+	-	-	8.33	9.52	71.43	>714,29	1.14286	3.3
44	Chelonian	Pseudemys spp.	G	Salmonella spp.	S	S	S	I	I	S	S	R	S	S	S	+	+	+	-	8.93	10.72	71.43	500	1.20045	6
46	Saurian	Pogona vitticeps	H	Salmonella spp.	S	S	S	S	S	S	S	R	S	S	S	+	+	-	-	9.52	20.24	71.43	>714,29	2.12605	4
47	Chelonian	Traquemys scripta elegans	I	Salmonella enterica subsp. arizonae	R	R	S	I	S	S	S	R	S	S	R	+	+	+	-	10.72	44.9	71.43	71.43	4.18843	3.7
48	Chelonian	Traquemys scripta elegans	I	Salmonella spp.	S	S	S	S	S	S	S	R	S	S	S	+	+	-	-	8.16	40.48	71.43	392.96	4.96078	3.7
50	Saurian	Ctenosaura quinquecarinata	J	Salmonella enterica subsp. arizonae	S	S	S	I	S	S	S	R	S	S	S	+	+	+	-	9.52	21.43	71.43	285.72	2.25105	4
52	Saurian	Physignatus cocincinus	J	Salmonella enterica subsp. arizonae	S	S	S	R	S	S	S	R	S	S	S	+	+	+	-	10.72	22.62	61.91	309.53	2.11007	5
53	Saurian	Physignatus cocincinus	J	Salmonella einterica subsp. arizonae	S	S	S	S	S	S	S	R	S	S	S	+	+	+	-	10.21	13.1	57.15	392.89	1.28306	4
54	Saurian	Tupinambis rufrescens	J	Salmonella enterica subsp. arizonae	S	S	S	S	S	S	S	R	S	S	S	+	+	+	-	14.29	23.81	71.43	714.29	1.6662	5.7
55	Saurian	Pogona vitticeps	J	Salmonella spp.	S	S	S	S	S	S	S	R	S	S	S	+	+	-	-	9.52	30.95	71.43	>714,29	3.25105	3.8
56	Saurian	Pogona vitticeps	J	Salmonella enterica subsp. arizonae	S	S	S	S	S	S	S	R	S	S	S	+	+	-	-	13.1	13.1	232.15	>714,29	1	4.7
58	Saurian	Gerrhosaurus major	J	Salmonella enterica subsp. arizonae	S	S	S	S	S	S	S	R	S	S	S	+	+	+	-	12.25	14.29	52.38	392.86	1.16653	4.7
61	Saurian	Hydrosaurus amboinensis	J	Salmonella enterica subsp. arizonae	S	S	S	S	S	S	S	R	S	S	S	+	+	+	-	14.29	23.81	57.15	89.29	1.6662	-
62	Saurian	Chlamydosaurus kingii	J	Salmonella enterica subsp. arizonae	S	S	S	S	S	S	S	R	S	S	S	+	+	-	-	14.29	14.29	57.15	392.86	1	4
63	Saurian	Chlamydosaurus kingii	J	Salmonella spp.	S	S	S	S	S	S	S	R	S	S	S	+	+	-	-	14.29	42.86	71.43	392.86	2.9993	6
66	Saurian	Physignatus lesueurii lesueurii	J	Salmonella enterica subsp. arizonae	S	S	S	S	S	S	S	R	S	S	S	+	+	+	-	14.29	53.58	71.43	714.29	3.74948	3
69	Saurian	Iguana iguana	J	Salmonella enterica subsp. arizonae	S	S	S	S	S	S	S	R	S	S	S	+	+	+	-	23.81	247.62	71.43	>714,29	10.3998	5
70	Ophidian	Pyton regius	K	Salmonella enterica subsp. arizonae	S	S	S	S	S	S	S	R	S	S	S	+	+	+	-	13.1	85.72	71.43	>714,29	6.54351	-
73	Ophidian	Pantherophis guttatus guttatus	K	Salmonella spp.	S	S	S	S	S	S	S	R	S	S	S	+	+	+	-	10.72	20.54	71.43	410.72	1.91604	5
76	Saurian	Pogona vitticeps	L	Salmonella spp.	S	S	S	S	S	S	S	R	S	S	S	+	+	+	-	10.72	18.37	71.43	471.43	1.71362	3
Abbreviations: AMC, amoxicillin/clavulanic acid; AMP, ampicillin; AK, amikacin; C, chloramphenicol; CN, gentamicin; CTX, cefotaxime; ENR, enrofloxacin; NA, nalidixic acid; P, penicillin; CIP, ciprofloxacin; SXT, sulfamethoxazole/trimethoprim; TE, tetracycline; S, sensible; I, Intermediate; R, resistant;
Hemol., Hemolytic activity; Lipo., lipolytic activity; Dnase, DNase activity; Gelat., gelatinolytic activity; +, positive; -, negative; MIC, Minimum Inhibitory Concentration; MBC, Minimum Bactericidal Concentration; MBIC, Minimum Biofilm Inhibitory Concentration; MBEC, Minimum Biofilm Eradication Concentration.
